# Supplementary material for: The relationship between the degree of branching and glass transition temperature of branched polyethylene: experiment and simulation
Source: Royal Society of Chemistry journal article supplement (doi:10.1039/c3py00896g), 2013-10-23
Supplement: c3py00896g.pdf [file c3py00896g.pdf]

## Supporting Information for

# Relationship between Degree of Branching and Glass Transition Temperature of Branched Polyethylene: Experiment and Simulation

Xiang Luo, Shijie Xie, Jun Liu, Haibin Hu, Jing Jiang, Wei Huang, Haiyang Gao, Dongshan Zhou, Zhongyuan Lü and Deyue Yan

Scheme S1

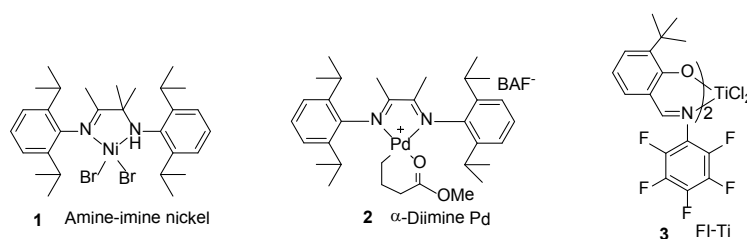

Scheme S1 Catalyst structures for the ethylene polymerization

Fig. S1

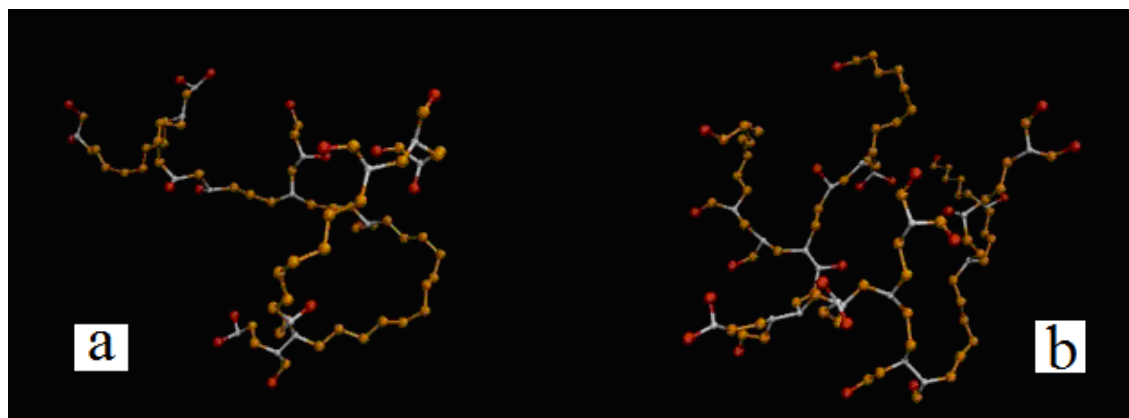

Fig. S1a A snapshot showing the nearly linear polyethylene chain with short branches; b A snapshot of the polyethylene with 'hyperbranched' structure. The red beads represent  $\text{CH}_3$ , the orange beads represent  $\text{CH}_2$ , and the white beads represent  $\text{CH}$ .

Fig. S2

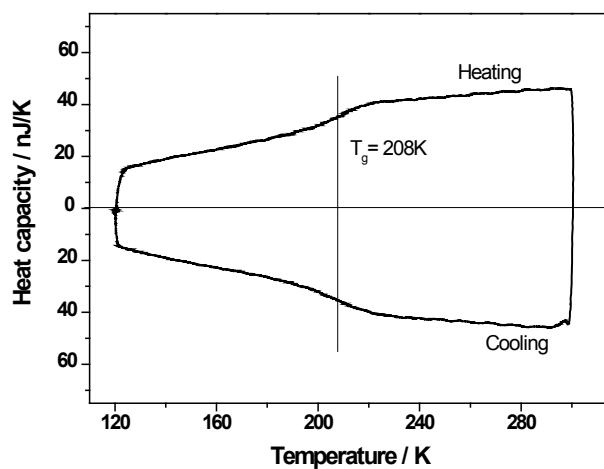

Fig. S2 Heating and cooling curve of branched PE 6 at scanning rate of 500K/s

Fig.S3

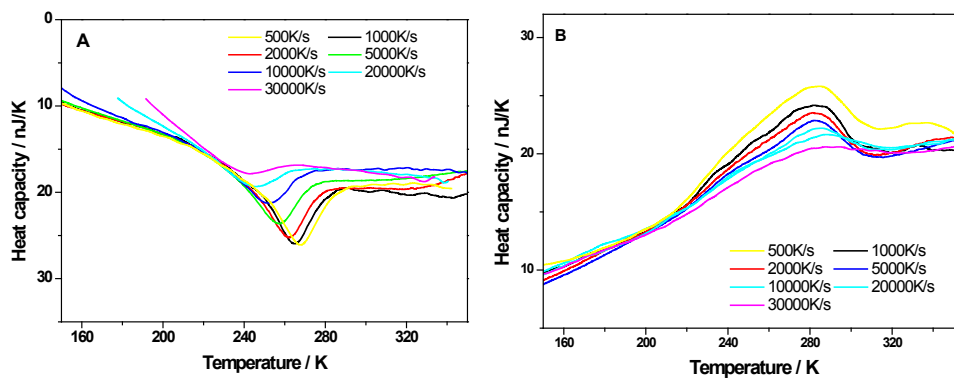

Fig. S3 Cooling (A)/heating (B) curves of branched PE 4 at the corresponding different rates  
(from 500 K/s to 30000 K/s)
